# Supplementary material
Source: PubMed Central journal article supplement (PMC2714383)
Supplement: jn.108.103754_1.pdf [file jn.108.103754_1.pdf]

# Online Supporting Material

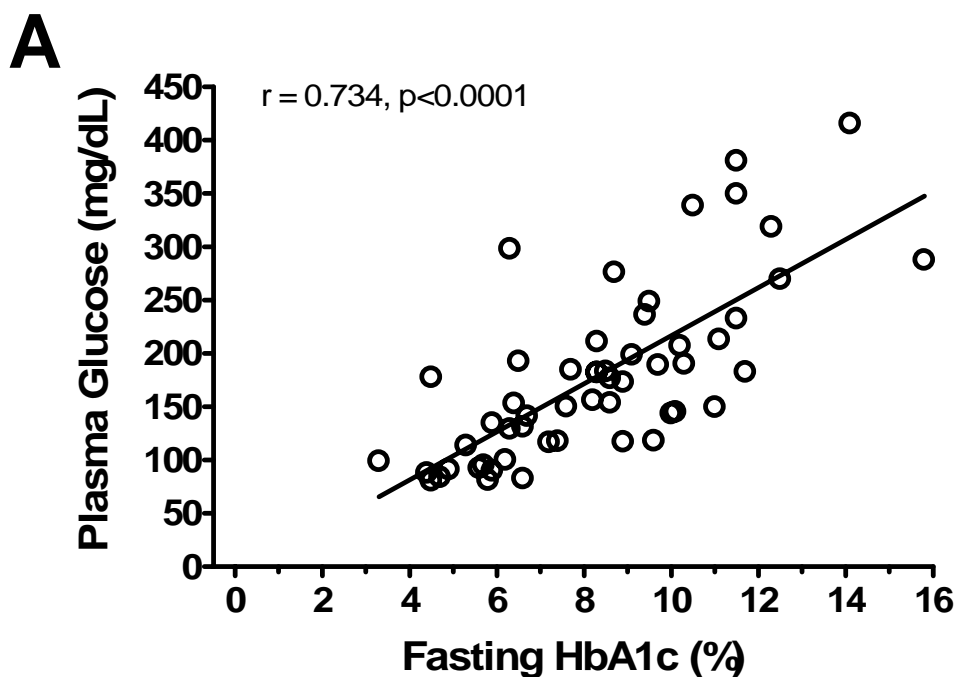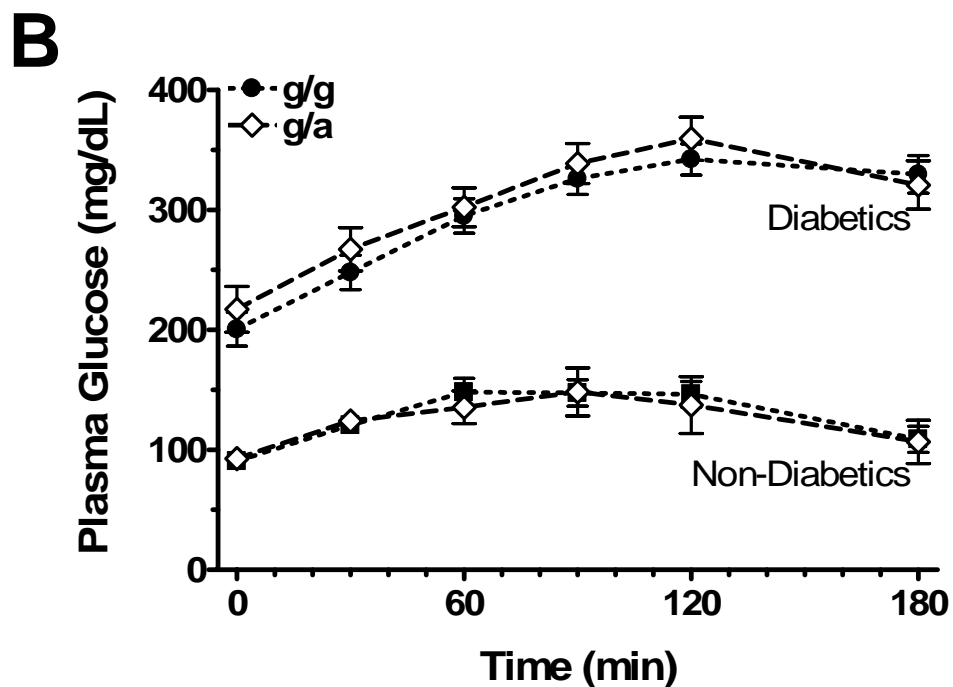

**Supplemental Figure 1. Diabetes Status in Overweight to Obese Adult Female Volunteers with or without a Missense UCP3 Polymorphism (g/a genotype).** Panel A, relationship between fasting blood hemoglobin A1c (HbA1c) and plasma glucose illustrating the expected tight correlation between increasingly poor long-term blood sugar control and fasting glucose in study participants. Panel B, high fasting glucose and poor glucose tolerance following an oral glucose tolerance test in type 2 diabetics: no significant differences were observed across genotype for fasting glucose, HbA1c, or glucose area-under-the-curve (n=22/genotype for diabetics, n=6/genotype for non-diabetics); mean  $\pm$  SEM.
